# Supplementary material for: Metabolic perturbations and health impact from exposure to a combination of multiple harmful Maillard reaction products on Sprague-Dawley rats
Source: Royal Society of Chemistry journal article supplement (doi:10.1039/d2fo00143h), 2022-01-01
Supplement: d2fo00143h1.pdf [file d2fo00143h1.pdf]

## Supplementary files

Metabolic perturbations and health impacts from exposure to combination  
of mutiple harmful Maillard reaction products on Sprague-Dawley rats

Wei Quan<sup>\*, a, c</sup>, Yong Lin<sup>b</sup>, Chaoyi Xue<sup>c</sup>, Yong Cheng<sup>c</sup>, Jie Luo<sup>a</sup>, Aihua Lou<sup>a</sup>,

Maomao Zeng<sup>c</sup>, Zhiyong He<sup>c</sup>, Qingwu Shen<sup>a</sup>, Jie Chen<sup>\*, c, d</sup>

<sup>a</sup> College of Food Science and Technology, Hunan Agricultural University, Changsha,

Hunan 410128, China

<sup>b</sup> National Research Center of Engineering Technology for Utilization of Functional

Ingredients from Botanicals, Hunan Agricultural University, Changsha, Hunan

410128, China

<sup>c</sup> State Key Laboratory of Food Science and Technology, Jiangnan University, Wuxi,

Jiangsu 214122, China

<sup>d</sup> International Joint Laboratory on Food Safety, Jiangnan University, Wuxi, Jiangsu

214122, China

\*Corresponding author: Dr. Wei Quan and Prof. Jie Chen

E-mail: Reus\_quan@hunau.edu.cn and Chenjie@jiangnan.edu.cn

Tel.: +86 510 85919065; Fax: +86 510 85919065

**Supplementary Table 1.** The pathway analysis of the identified metabolites affected in the experiment groups. Based on the selected metabolites, the global metabolic disorders of the most relevant pathways induced by acrylamide, CML, harmane and co-accumulation were revealed using the MetaboAnalyst 4.0.

| Group      | Metabolism pathway                          | P      | -log(p) | Holm adjust | FDR    | Impact |
|------------|---------------------------------------------|--------|---------|-------------|--------|--------|
| Acrylamide | Arginine biosynthesis                       | 0.0028 | 5.8875  | 0.2330      | 0.2316 | 0.1776 |
|            | Pentose phosphate pathway                   | 0.0063 | 5.0730  | 0.5199      | 0.2316 | 0.0022 |
|            | Glutathione metabolism                      | 0.0110 | 4.5069  | 0.9046      | 0.2316 | 0.0196 |
|            | Alanine, aspartate and glutamate metabolism | 0.0110 | 4.5069  | 0.9046      | 0.2316 | 0.1971 |
|            | Arginine and proline metabolism             | 0.0199 | 3.9176  | 1           | 0.3341 | 0.1966 |
|            | Aminoacyl-tRNA biosynthesis                 | 0.0309 | 3.4759  | 1           | 0.3707 | 0      |
|            | Nitrogen metabolism                         | 0.0353 | 3.3435  | 1           | 0.3707 | 0      |
|            | D-Glutamine and D-glutamate metabolism      | 0.0353 | 3.3435  | 1           | 0.3707 | 0.5    |
| Harmane    | Arginine biosynthesis                       | 0.0007 | 7.1471  | 0.0661      | 0.0661 | 0.2893 |
| CML        | Arginine biosynthesis                       | 0.0004 | 7.6526  | 0.0398      | 0.0398 | 0.2893 |
| Com        | Arginine biosynthesis                       | 0.0276 | 3.5902  | 1           | 0.8531 | 0      |
|            | Fructose and mannose metabolism             | 0.0354 | 3.3415  | 1           | 0.8531 | 0      |
|            | Citrate cycle (TCA cycle)                   | 0.0392 | 3.2375  | 1           | 0.8531 | 0.0298 |
|            | Pyruvate metabolism                         | 0.0431 | 3.1435  | 1           | 0.8531 | 0      |

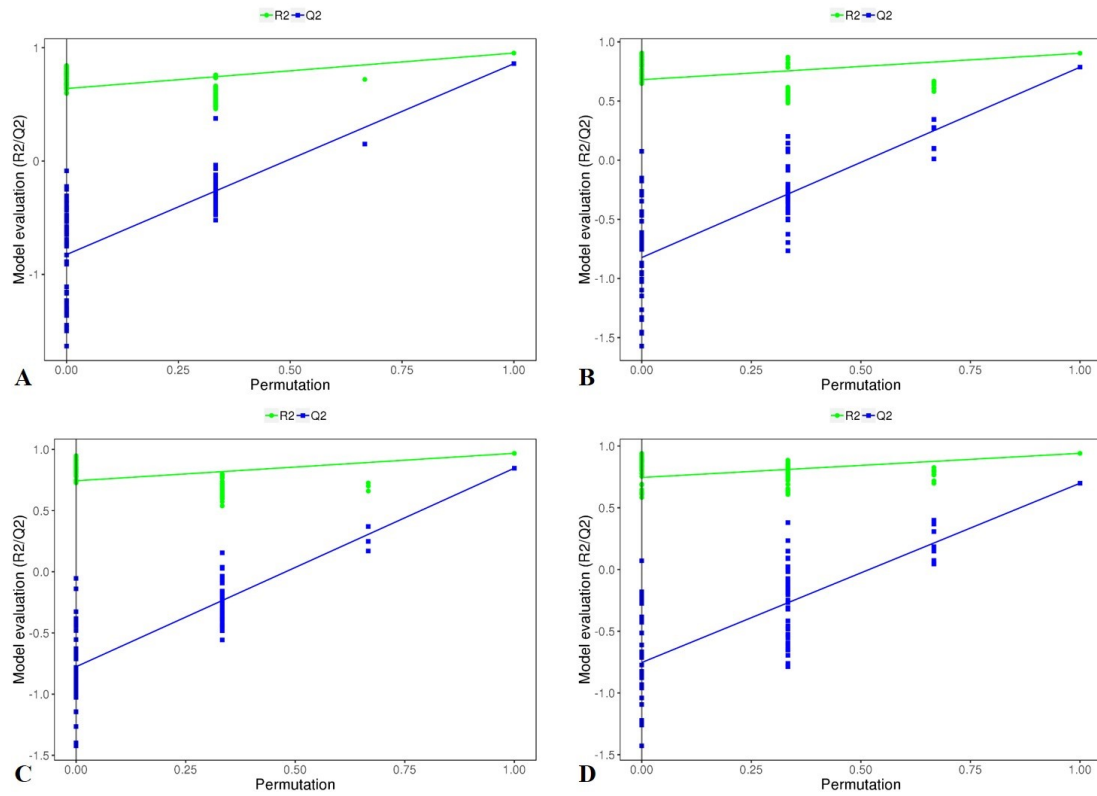

**Supplementary Figure 1.** Permutation test plots based on GC-TOF-MS spectra of serum sample. (A) Acrylamide group, (B) Harmane group, (C) CML group, and (D) Co-accumulation group.

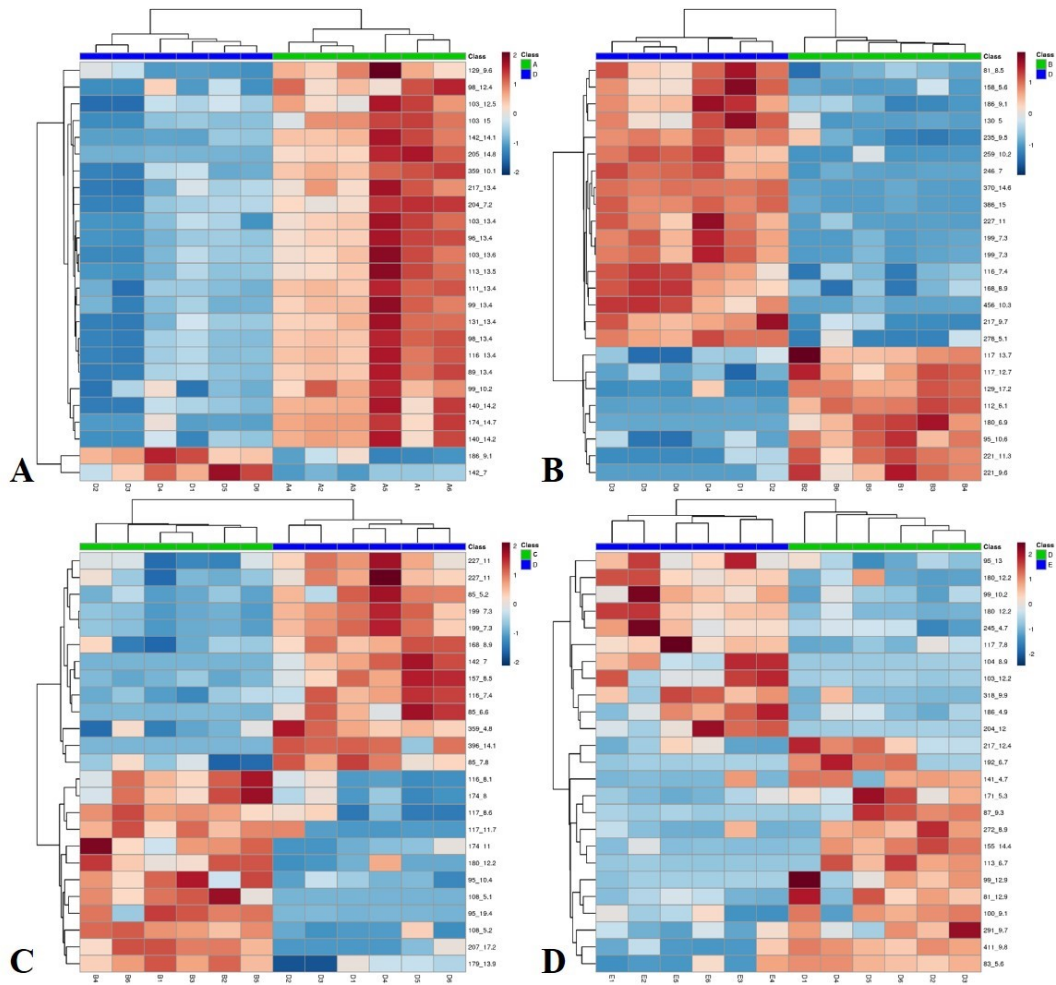

**Supplementary Figure. 2** Heat map visualizing the changes in the concentration of potential biomarkers in the serum sample of all four groups. Rows: samples. Columns: biomarkers extracted from the volcano plot in the serum samples of the control group and acrylamide group (A), harmane group (B), CML group (C), and co-accumulation group (D). Color key indicates the concentration of metabolites: blue, lowest; red, highest.
